# Supplementary material for: Urban environment predisposes dogs and their owners to allergic symptoms
Source: PubMed Central journal article supplement (PMC5785484; doi:10.1038/s41598-018-19953-3), 2018-01-25
Supplement: 41598_2018_19953_MOESM1_ESM.pdf [file 41598_2018_19953_MOESM1_ESM.pdf]

## SUPPLEMENTARY MATERIAL

Urban environment predisposes dogs and their owners to allergic symptoms

Emma Hakanen<sup>1</sup>, Jenni Lehtimäki<sup>1\*</sup>, Elina Salmela<sup>1,2</sup>, Katriina Tiira<sup>2</sup>, Johanna Anturaniemi<sup>3</sup>, Anna Hielm-Björkman<sup>3</sup>, Lasse Ruokolainen<sup>1</sup> and Hannes Lohi<sup>2</sup>

1 Department of Biosciences, University of Helsinki, PL 65 FI-00014 Helsinki, Finland.

2 Research Programs Unit, Molecular Neurology, and Department of Veterinary Biosciences, University of Helsinki, Helsinki, Finland; The Folkhälsan Institute of Genetics, Helsinki, Finland

3 Department of Equine and Small Animal Medicine, University of Helsinki, PL 57, FI-00014 Helsinki, Finland

\*To whom correspondence should be addressed: Jenni Lehtimäki, PL 65, FI-00014 Helsinki, Finland, +358504480047, [jenni.lehtimaki@helsinki.fi](mailto:jenni.lehtimaki@helsinki.fi)

**Table S1.** This table shows all the breeds in total data, the number of individuals per breed, and the breeds' prevalence in this study (ns and %s, respectively). The data in this study is compared to the statistics about dog breeds in Finland: the number of individuals in each breed in Finland is provided (np) as well as the prevalence of each breed in Finnish population (%p). Finally, the ratio of breeds' prevalence in our data and their prevalence in Finland is provided (%-ratio). 'No data' means that the breed is not officially registered by the Finnish Kennel Club. Breeds in the *Allergy-tolerant* and *Common breeds* subsets are marked with *italicized* and **bolded** text, respectively.

| Breed                                   | <i>n<sub>s</sub></i> | % <sub>s</sub> | <i>n<sub>p</sub></i> | % <sub>p</sub> | %-ratio |
|-----------------------------------------|----------------------|----------------|----------------------|----------------|---------|
| <i>Affenpinscher</i>                    | 6                    | 0.0010         | 363                  | 0.0008         | 1.39    |
| <i>Afghan Hound</i>                     | 34                   | 0.0059         | 610                  | 0.0013         | 4.68    |
| <i>Airedale Terrier</i>                 | 30                   | 0.0052         | 747                  | 0.0016         | 3.37    |
| <i>Akita</i>                            | 24                   | 0.0042         | 524                  | 0.0011         | 3.85    |
| <i>Alaskan Malamute</i>                 | 10                   | 0.0017         | 1523                 | 0.0032         | 0.55    |
| <i>Alpine Dachsbracke</i>               | 2                    | 0.0003         | 20                   | 0.0000         | 8.40    |
| <i>American Akita</i>                   | 13                   | 0.0023         | 1381                 | 0.0029         | 0.79    |
| American bulldog                        | 2                    | 0.0003         | no data              | no data        | no data |
| <i>American Cocker Spaniel</i>          | 15                   | 0.0026         | 1292                 | 0.0027         | 0.98    |
| <i>American Hairless Terrier</i>        | 10                   | 0.0017         | no data              | no data        | no data |
| American Staffordshire Terrier          | 36                   | 0.0063         | 1823                 | 0.0038         | 1.66    |
| <i>American Water Spaniel</i>           | 1                    | 0.0002         | 46                   | 0.0001         | 1.83    |
| <i>Appenzeller Sennenhund</i>           | 10                   | 0.0017         | 260                  | 0.0005         | 3.23    |
| <i>Australian Cattle Dog</i>            | 7                    | 0.0012         | 313                  | 0.0007         | 1.88    |
| <i>Australian Kelpie</i>                | 36                   | 0.0063         | 784                  | 0.0016         | 3.86    |
| <i>Australian Shepherd</i>              | 59                   | 0.0103         | 2650                 | 0.0055         | 1.87    |
| Australian Silky Terrier                | 14                   | 0.0024         | 1098                 | 0.0023         | 1.07    |
| <i>Australian Terrier</i>               | 31                   | 0.0054         | 2375                 | 0.0049         | 1.10    |
| <i>Barbet</i>                           | 22                   | 0.0038         | 381                  | 0.0008         | 4.85    |
| <i>Basenji</i>                          | 19                   | 0.0033         | 730                  | 0.0015         | 2.19    |
| <i>Basset Artésien Normand</i>          | 1                    | 0.0002         | 37                   | 0.0001         | 2.27    |
| <i>Basset Fauve de Bretagne</i>         | 16                   | 0.0028         | 520                  | 0.0011         | 2.59    |
| <i>Basset Hound</i>                     | 5                    | 0.0009         | 636                  | 0.0013         | 0.66    |
| <i>Bavarian Mountain Hound</i>          | 1                    | 0.0002         | 46                   | 0.0001         | 1.83    |
| <i>Beagle</i>                           | 40                   | 0.0070         | 5833                 | 0.0121         | 0.58    |
| <i>Bearded Collie</i>                   | 31                   | 0.0054         | 653                  | 0.0014         | 3.99    |
| <i>Beauceron</i>                        | 12                   | 0.0021         | 743                  | 0.0015         | 1.36    |
| <i>Bedlington Terrier</i>               | 3                    | 0.0005         | 281                  | 0.0006         | 0.90    |
| <i>Belgian Shepherd Dog Groenendael</i> | 47                   | 0.0082         | 1326                 | 0.0028         | 2.98    |
| <i>Belgian Shepherd Dog Laekenois</i>   | 7                    | 0.0012         | 59                   | 0.0001         | 9.97    |
| <i>Belgian Shepherd Dog Malinois</i>    | 45                   | 0.0079         | 1739                 | 0.0036         | 2.17    |
| <i>Belgian Shepherd Dog Tervueren</i>   | 51                   | 0.0089         | 1554                 | 0.0032         | 2.76    |
| <i>Bernese Mountain Dog</i>             | 81                   | 0.0142         | 4696                 | 0.0098         | 1.45    |
| Bichon Frisé                            | 46                   | 0.0080         | 6308                 | 0.0131         | 0.61    |
| <i>Black Russian Terrier</i>            | 20                   | 0.0035         | 504                  | 0.0010         | 3.33    |
| <i>Bloodhound</i>                       | 1                    | 0.0002         | 71                   | 0.0001         | 1.18    |
| <i>Blue Picardy Spaniel</i>             | 2                    | 0.0003         | 9                    | 0.0000         | 18.67   |
| <i>Bohemian Shepherd</i>                | 3                    | 0.0005         | 98                   | 0.0002         | 2.57    |
| <i>Bolognese</i>                        | 2                    | 0.0003         | 869                  | 0.0018         | 0.19    |
| <i>Bolonka</i>                          | 1                    | 0.0002         | 58                   | 0.0001         | 1.45    |
| <b>Border Collie</b>                    | 104                  | 0.0182         | 4190                 | 0.0087         | 2.09    |
| <i>Border Terrier</i>                   | 27                   | 0.0047         | 2584                 | 0.0054         | 0.88    |
| <i>Borzoi</i>                           | 31                   | 0.0054         | 864                  | 0.0018         | 3.01    |
| Boston Terrier                          | 22                   | 0.0038         | 1650                 | 0.0034         | 1.12    |
| <i>Bouvier des Ardennes</i>             | 1                    | 0.0002         | 1                    | 0.0000         | 84.03   |

|                                      |    |        |         |         |         |
|--------------------------------------|----|--------|---------|---------|---------|
| <i>Bouvier des Flandres</i>          | 12 | 0.0021 | 474     | 0.0010  | 2.13    |
| <i>Boxer</i>                         | 73 | 0.0128 | 2753    | 0.0057  | 2.23    |
| <i>Bracco Italiano</i>               | 6  | 0.0010 | 185     | 0.0004  | 2.73    |
| <i>Braque du Bourbonnais</i>         | 2  | 0.0003 | 64      | 0.0001  | 2.63    |
| <i>Brazilian Terrier</i>             | 13 | 0.0023 | 1308    | 0.0027  | 0.84    |
| <i>Briard</i>                        | 7  | 0.0012 | 421     | 0.0009  | 1.40    |
| <i>Brittany</i>                      | 8  | 0.0014 | 1076    | 0.0022  | 0.62    |
| <i>Broholmer</i>                     | 7  | 0.0012 | 115     | 0.0002  | 5.11    |
| <i>Bull Terrier</i>                  | 28 | 0.0049 | 621     | 0.0013  | 3.79    |
| <i>Bulldog</i>                       | 18 | 0.0031 | 2198    | 0.0046  | 0.69    |
| <i>Bullmastiff</i>                   | 13 | 0.0023 | 1328    | 0.0028  | 0.82    |
| <i>Cairn Terrier</i>                 | 51 | 0.0089 | 4567    | 0.0095  | 0.94    |
| <i>Canaan Dog</i>                    | 1  | 0.0002 | 38      | 0.0001  | 2.21    |
| <i>Cane Corso</i>                    | 5  | 0.0009 | 479     | 0.0010  | 0.88    |
| <i>Catalonian Sheepdog</i>           | 5  | 0.0009 | 204     | 0.0004  | 2.06    |
| <i>Caucasian Shepherd Dog</i>        | 3  | 0.0005 | 644     | 0.0013  | 0.39    |
| <i>Cavalier King Charles Spaniel</i> | 33 | 0.0058 | 7531    | 0.0157  | 0.37    |
| <i>Central Asia Shepherd Dog</i>     | 1  | 0.0002 | 300     | 0.0006  | 0.28    |
| <i>Cesky Terrier</i>                 | 4  | 0.0007 | 108     | 0.0002  | 3.11    |
| <i>Chihuahua</i>                     | 21 | 0.0037 | 13548   | 0.0282  | 0.13    |
| <i>Chinese Crested Dog</i>           | 46 | 0.0080 | 4722    | 0.0098  | 0.82    |
| <i>Chow Chow</i>                     | 20 | 0.0035 | 1238    | 0.0026  | 1.36    |
| <i>Chukotka sleddog</i>              | 1  | 0.0002 | no data | no data | no data |
| <i>Cirneco dell'Etna</i>             | 13 | 0.0023 | 279     | 0.0006  | 3.92    |
| <i>Clumber Spaniel</i>               | 1  | 0.0002 | 183     | 0.0004  | 0.46    |
| <i>Collie Rough</i>                  | 66 | 0.0115 | 6513    | 0.0135  | 0.85    |
| <i>Collie Smooth</i>                 | 40 | 0.0070 | 2050    | 0.0043  | 1.64    |
| <i>Continental Toy Spaniel</i>       | 13 | 0.0023 | 3788    | 0.0079  | 0.29    |
| <i>Coton de Tulear</i>               | 58 | 0.0101 | 5451    | 0.0113  | 0.89    |
| <i>Croatian Shepherd Dog</i>         | 2  | 0.0003 | 43      | 0.0001  | 3.91    |
| <i>Curly Coated Retriever</i>        | 24 | 0.0042 | 399     | 0.0008  | 5.05    |
| <i>Czechoslovakian Wolfdog</i>       | 2  | 0.0003 | 194     | 0.0004  | 0.87    |
| <i>Dachshund Long-Haired</i>         | 17 | 0.0030 | 1948    | 0.0041  | 0.73    |
| <i>Dachshund Short-Haired</i>        | 11 | 0.0019 | 2888    | 0.0060  | 0.32    |
| <i>Dachshund Wire-Haired</i>         | 32 | 0.0056 | 7276    | 0.0151  | 0.37    |
| <i>Dalmatian</i>                     | 21 | 0.0037 | 1850    | 0.0038  | 0.95    |
| <i>Dandie Dinmont Terrier</i>        | 9  | 0.0016 | 339     | 0.0007  | 2.23    |
| <i>Danish-Swedish Farmdog</i>        | 26 | 0.0045 | 998     | 0.0021  | 2.19    |
| <i>Deerhound</i>                     | 2  | 0.0003 | 272     | 0.0006  | 0.62    |
| <i>Deutsch Drahthaar</i>             | 21 | 0.0037 | 2865    | 0.0060  | 0.62    |
| <i>Dobermann</i>                     | 23 | 0.0040 | 2113    | 0.0044  | 0.91    |
| <i>Dogo Argentino</i>                | 5  | 0.0009 | 457     | 0.0010  | 0.92    |
| <i>Dogue de Bordeaux</i>             | 3  | 0.0005 | 404     | 0.0008  | 0.62    |
| <i>Do-Khyi</i>                       | 5  | 0.0009 | 865     | 0.0018  | 0.49    |
| <i>Drentsche Partridge Dog</i>       | 1  | 0.0002 | 3       | 0.0000  | 28.01   |
| <i>Drever</i>                        | 12 | 0.0021 | 2300    | 0.0048  | 0.44    |
| <i>Dutch Schapendoes</i>             | 9  | 0.0016 | 905     | 0.0019  | 0.84    |
| <i>Dutch Shepherd Dog</i>            | 23 | 0.0040 | 870     | 0.0018  | 2.22    |
| <i>East Siberian Laika</i>           | 7  | 0.0012 | 3104    | 0.0065  | 0.19    |
| <i>English Cocker Spaniel</i>        | 29 | 0.0051 | 6842    | 0.0142  | 0.36    |
| <i>English Pointer</i>               | 3  | 0.0005 | 325     | 0.0007  | 0.78    |
| <i>English Setter</i>                | 7  | 0.0012 | 861     | 0.0018  | 0.68    |
| <i>English Springer Spaniel</i>      | 30 | 0.0052 | 3166    | 0.0066  | 0.80    |
| <i>English Toy Terrier</i>           | 7  | 0.0012 | 482     | 0.0010  | 1.22    |

|                                          |     |        |         |         |         |
|------------------------------------------|-----|--------|---------|---------|---------|
| <i>Entlebuch Cattle Dog</i>              | 2   | 0.0003 | 156     | 0.0003  | 1.08    |
| <i>Estonian Hound</i>                    | 2   | 0.0003 | 379     | 0.0008  | 0.44    |
| <i>Estrela Mountain Dog</i>              | 9   | 0.0016 | 418     | 0.0009  | 1.81    |
| <i>Eurasian</i>                          | 5   | 0.0009 | 580     | 0.0012  | 0.72    |
| <i>Field Spaniel</i>                     | 5   | 0.0009 | 464     | 0.0010  | 0.91    |
| <i>Finnish Hound</i>                     | 39  | 0.0068 | 17909   | 0.0372  | 0.18    |
| <b><i>Finnish Lapphund</i></b>           | 254 | 0.0444 | 11929   | 0.0248  | 1.79    |
| <i>Finnish Spitz</i>                     | 49  | 0.0086 | 7358    | 0.0153  | 0.56    |
| <i>Flat Coated Retriever</i>             | 70  | 0.0122 | 2642    | 0.0055  | 2.23    |
| <i>Fox Terrier Smooth</i>                | 9   | 0.0016 | 1636    | 0.0034  | 0.46    |
| <i>Fox Terrier Wire</i>                  | 15  | 0.0026 | 1200    | 0.0025  | 1.05    |
| <i>French Bulldog</i>                    | 45  | 0.0079 | 4544    | 0.0095  | 0.83    |
| <i>German Hunting Terrier</i>            | 7   | 0.0012 | 1716    | 0.0036  | 0.34    |
| <i>German Pinscher</i>                   | 30  | 0.0052 | 867     | 0.0018  | 2.91    |
| <i>German Shepherd Dog</i>               | 310 | 0.0542 | 17394   | 0.0362  | 1.50    |
| <i>German Short-Haired Pointing Dog</i>  | 26  | 0.0045 | 2425    | 0.0050  | 0.90    |
| <i>Giant Schnauzer</i>                   | 28  | 0.0049 | 1522    | 0.0032  | 1.55    |
| <i>Golden Retriever</i>                  | 108 | 0.0189 | 13953   | 0.0290  | 0.65    |
| <i>Gordon Setter</i>                     | 7   | 0.0012 | 823     | 0.0017  | 0.71    |
| <i>Grand Basset Griffon Vendeen</i>      | 3   | 0.0005 | 222     | 0.0005  | 1.14    |
| <i>Great Dane</i>                        | 52  | 0.0091 | 3169    | 0.0066  | 1.38    |
| <i>Great Swiss Mountain Dog</i>          | 1   | 0.0002 | 95      | 0.0002  | 0.88    |
| <i>Greyhound</i>                         | 4   | 0.0007 | 405     | 0.0008  | 0.83    |
| <i>Griffon Belge</i>                     | 2   | 0.0003 | 259     | 0.0005  | 0.65    |
| <i>Griffon Bruxellois</i>                | 2   | 0.0003 | 467     | 0.0010  | 0.36    |
| <i>Havanese</i>                          | 34  | 0.0059 | 5193    | 0.0108  | 0.55    |
| <i>Hellenic Hound</i>                    | 1   | 0.0002 | no data | no data | no data |
| <i>Hovawart</i>                          | 17  | 0.0030 | 2052    | 0.0043  | 0.70    |
| <i>Hungarian Greyhound</i>               | 2   | 0.0003 | 85      | 0.0002  | 1.98    |
| <i>Ibizan Podenco</i>                    | 6   | 0.0010 | 102     | 0.0002  | 4.94    |
| <i>Icelandic Sheepdog</i>                | 16  | 0.0028 | 596     | 0.0012  | 2.26    |
| <i>Irish Glen of Imaal Terrier</i>       | 6   | 0.0010 | 512     | 0.0011  | 0.98    |
| <i>Irish Red and White Setter</i>        | 2   | 0.0003 | 131     | 0.0003  | 1.28    |
| <i>Irish Red Setter</i>                  | 26  | 0.0045 | 2476    | 0.0051  | 0.88    |
| <i>Irish Soft Coated Wheaten Terrier</i> | 59  | 0.0103 | 1445    | 0.0030  | 3.43    |
| <i>Irish Terrier</i>                     | 4   | 0.0007 | 402     | 0.0008  | 0.84    |
| <i>Irish Water Spaniel</i>               | 5   | 0.0009 | 152     | 0.0003  | 2.76    |
| <i>Irish Wolfhound</i>                   | 22  | 0.0038 | 1465    | 0.0030  | 1.26    |
| <i>Italian Greyhound</i>                 | 26  | 0.0045 | 807     | 0.0017  | 2.71    |
| <i>Italian Short-Haired Segugio</i>      | 1   | 0.0002 | 16      | 0.0000  | 5.25    |
| <i>Jack Russel Terrier</i>               | 72  | 0.0126 | 8684    | 0.0181  | 0.70    |
| <i>Japanese Spitz</i>                    | 12  | 0.0021 | 1735    | 0.0036  | 0.58    |
| <i>Jämthund</i>                          | 21  | 0.0037 | 12780   | 0.0266  | 0.14    |
| <i>Kai</i>                               | 2   | 0.0003 | 16      | 0.0000  | 10.50   |
| <i>Karelian Bear Dog</i>                 | 41  | 0.0072 | 7120    | 0.0148  | 0.48    |
| <i>Keeshond</i>                          | 17  | 0.0030 | 1136    | 0.0024  | 1.26    |
| <i>Kerry Blue Terrier</i>                | 7   | 0.0012 | 403     | 0.0008  | 1.46    |
| <i>King Charles Spaniel</i>              | 4   | 0.0007 | 230     | 0.0005  | 1.46    |
| <i>Kleiner Münsterländer</i>             | 6   | 0.0010 | 482     | 0.0010  | 1.05    |
| <i>Kooikerhondje</i>                     | 40  | 0.0070 | 833     | 0.0017  | 4.03    |
| <i>Koolie</i>                            | 1   | 0.0002 | no data | no data | no data |
| <i>Kromfohrländer</i>                    | 20  | 0.0035 | 369     | 0.0008  | 4.55    |
| <i>Labrador Retriever</i>                | 126 | 0.0220 | 17913   | 0.0373  | 0.59    |
| <b><i>Lagotto Romagnolo</i></b>          | 121 | 0.0211 | 3122    | 0.0065  | 3.26    |

|                                           |     |        |         |         |         |
|-------------------------------------------|-----|--------|---------|---------|---------|
| <i>Lakeland Terrier</i>                   | 2   | 0.0003 | 135     | 0.0003  | 1.24    |
| <i>Lancashire Heeler</i>                  | 28  | 0.0049 | 958     | 0.0020  | 2.46    |
| <i>Landseer</i>                           | 9   | 0.0016 | 1091    | 0.0023  | 0.69    |
| <i>Lapponian Herder</i>                   | 95  | 0.0166 | 2490    | 0.0052  | 3.21    |
| <i>Large Munsterlander</i>                | 5   | 0.0009 | 80      | 0.0002  | 5.25    |
| <i>Leonberger</i>                         | 39  | 0.0068 | 2582    | 0.0054  | 1.27    |
| <i>Lhasa Apso</i>                         | 1   | 0.0002 | 802     | 0.0017  | 0.10    |
| <i>Little Lion Dog</i>                    | 5   | 0.0009 | 489     | 0.0010  | 0.86    |
| <i>Maltese</i>                            | 2   | 0.0003 | 617     | 0.0013  | 0.27    |
| <i>Manchester Terrier</i>                 | 9   | 0.0016 | 361     | 0.0008  | 2.09    |
| <i>Mastiff</i>                            | 5   | 0.0009 | 294     | 0.0006  | 1.43    |
| <i>Medium Poodle</i>                      | 32  | 0.0056 | 3018    | 0.0063  | 0.89    |
| <i>Medium Size Spitz</i>                  | 13  | 0.0023 | 4993    | 0.0104  | 0.22    |
| <i>Miniature Bull Terrier</i>             | 13  | 0.0023 | 340     | 0.0007  | 3.21    |
| <i>Miniature Dachshund Long-Haired</i>    | 16  | 0.0028 | 2220    | 0.0046  | 0.61    |
| <i>Miniature Dachshund Short-Haired</i>   | 5   | 0.0009 | 1291    | 0.0027  | 0.33    |
| <i>Miniature Dachshund Wire-Haired</i>    | 6   | 0.0010 | 1617    | 0.0034  | 0.31    |
| <i>Miniature Pinscher</i>                 | 53  | 0.0093 | 5451    | 0.0113  | 0.82    |
| <i>Miniature Poodle</i>                   | 26  | 0.0045 | 4595    | 0.0096  | 0.48    |
| <i>Miniature Schnauzer</i>                | 95  | 0.0166 | 9778    | 0.0203  | 0.82    |
| <i>Miniature Spitz</i>                    | 19  | 0.0033 | 1911    | 0.0040  | 0.84    |
| <b><i>mixed-breed</i></b>                 | 111 | 0.0194 | no data | no data | no data |
| <i>Mudi</i>                               | 14  | 0.0024 | 357     | 0.0007  | 3.30    |
| <i>Newfoundland</i>                       | 36  | 0.0063 | 2152    | 0.0045  | 1.41    |
| <i>Norbottenspitz</i>                     | 17  | 0.0030 | 2793    | 0.0058  | 0.51    |
| <i>Norfolk Terrier</i>                    | 10  | 0.0017 | 972     | 0.0020  | 0.86    |
| <i>Norwegian Buhund</i>                   | 7   | 0.0012 | 77      | 0.0002  | 7.64    |
| <i>Norwegian Elkhound Grey</i>            | 29  | 0.0051 | 10213   | 0.0212  | 0.24    |
| <i>Norwegian Lundehund</i>                | 2   | 0.0003 | 254     | 0.0005  | 0.66    |
| <i>Norwich Terrier</i>                    | 12  | 0.0021 | 1257    | 0.0026  | 0.80    |
| <i>Nova Scotia Duck Tolling Retriever</i> | 72  | 0.0126 | 3610    | 0.0075  | 1.68    |
| <i>Old English Sheepdog</i>               | 14  | 0.0024 | 386     | 0.0008  | 3.05    |
| <i>Otterhound</i>                         | 1   | 0.0002 | 24      | 0.0000  | 3.50    |
| <i>Parson Russel Terrier</i>              | 35  | 0.0061 | 3798    | 0.0079  | 0.77    |
| <i>Peruvian Hairless Dog</i>              | 4   | 0.0007 | 412     | 0.0009  | 0.82    |
| <i>Petit Basset Griffon Vendeen</i>       | 10  | 0.0017 | 526     | 0.0011  | 1.60    |
| <i>Petit Brabaçon</i>                     | 8   | 0.0014 | 561     | 0.0012  | 1.20    |
| <i>Pharaoh Hound</i>                      | 9   | 0.0016 | 251     | 0.0005  | 3.01    |
| <i>Picardy Sheepdog</i>                   | 15  | 0.0026 | 68      | 0.0001  | 18.54   |
| <i>Picardy Spaniel</i>                    | 1   | 0.0002 | 17      | 0.0000  | 4.94    |
| <i>Polish Greyhound</i>                   | 3   | 0.0005 | 43      | 0.0001  | 5.86    |
| <i>Polish Lowland Sheepdog</i>            | 1   | 0.0002 | 251     | 0.0005  | 0.33    |
| <i>Pomeranian</i>                         | 8   | 0.0014 | 1911    | 0.0040  | 0.35    |
| <i>Pont-Audemer Spaniel</i>               | 2   | 0.0003 | 34      | 0.0001  | 4.94    |
| <i>Portuguese Podengo</i>                 | 1   | 0.0002 | 45      | 0.0001  | 1.87    |
| <i>Portuguese Sheepdog</i>                | 3   | 0.0005 | 534     | 0.0011  | 0.47    |
| <i>Portuguese Water Dog</i>               | 17  | 0.0030 | 1281    | 0.0027  | 1.12    |
| <i>Pražský krysařík</i>                   | 3   | 0.0005 | 188     | 0.0004  | 1.34    |
| <i>Pug</i>                                | 30  | 0.0052 | 3447    | 0.0072  | 0.73    |
| <i>Puli</i>                               | 2   | 0.0003 | 321     | 0.0007  | 0.52    |
| <i>Pumi</i>                               | 21  | 0.0037 | 764     | 0.0016  | 2.31    |
| <i>Pyrenean Mastiff</i>                   | 11  | 0.0019 | 1136    | 0.0024  | 0.81    |
| <i>Pyrenean Mountain Dog</i>              | 7   | 0.0012 | 602     | 0.0013  | 0.98    |
| <i>Pyrenean Sheepdog Long Haired</i>      | 7   | 0.0012 | 284     | 0.0006  | 2.07    |

|                                       |     |        |      |        |      |
|---------------------------------------|-----|--------|------|--------|------|
| <i>Pyrenean Sheepdog Smooth-Faced</i> | 8   | 0.0014 | 105  | 0.0002 | 6.40 |
| Rabbit Dachshund Long-Haired          | 5   | 0.0009 | 356  | 0.0007 | 1.18 |
| Rhodesian Ridgeback                   | 43  | 0.0075 | 807  | 0.0017 | 4.48 |
| <i>Rottweiler</i>                     | 74  | 0.0129 | 4721 | 0.0098 | 1.32 |
| <i>Russian Hound</i>                  | 1   | 0.0002 | 864  | 0.0018 | 0.10 |
| <i>Russian Toy</i>                    | 5   | 0.0009 | 959  | 0.0020 | 0.44 |
| <i>Russian-European Laika</i>         | 3   | 0.0005 | 355  | 0.0007 | 0.71 |
| <i>Saarloos Wolfhond</i>              | 2   | 0.0003 | 169  | 0.0004 | 0.99 |
| <i>Saluki</i>                         | 59  | 0.0103 | 944  | 0.0020 | 5.25 |
| <i>Samoyed</i>                        | 46  | 0.0080 | 2263 | 0.0047 | 1.71 |
| <i>Schipperke</i>                     | 31  | 0.0054 | 1316 | 0.0027 | 1.98 |
| Schnauzer                             | 27  | 0.0047 | 1411 | 0.0029 | 1.61 |
| <i>Scottish Terrier</i>               | 6   | 0.0010 | 611  | 0.0013 | 0.83 |
| <b>Shetland Sheepdog</b>              | 142 | 0.0248 | 9467 | 0.0197 | 1.26 |
| <i>Shiba</i>                          | 14  | 0.0024 | 633  | 0.0013 | 1.86 |
| Shih Tzu                              | 3   | 0.0005 | 958  | 0.0020 | 0.26 |
| <i>Siberian Husky</i>                 | 19  | 0.0033 | 5599 | 0.0116 | 0.29 |
| <i>Skye Terrier</i>                   | 4   | 0.0007 | 352  | 0.0007 | 0.95 |
| <i>Sloughi</i>                        | 2   | 0.0003 | 67   | 0.0001 | 2.51 |
| <i>Slovakian Chuvach</i>              | 3   | 0.0005 | 259  | 0.0005 | 0.97 |
| <i>Small Portuguese Podengo</i>       | 13  | 0.0023 | 971  | 0.0020 | 1.12 |
| <i>Southh Russian Shepherd Dog</i>    | 1   | 0.0002 | 122  | 0.0003 | 0.69 |
| <i>Spanish Greyhound</i>              | 2   | 0.0003 | 45   | 0.0001 | 3.73 |
| <i>Spanish Mastiff</i>                | 1   | 0.0002 | 134  | 0.0003 | 0.63 |
| <i>Spanish Water Dog</i>              | 59  | 0.0103 | 3962 | 0.0082 | 1.25 |
| <i>Spinone Italiano</i>               | 3   | 0.0005 | 129  | 0.0003 | 1.95 |
| <i>St. Bernard</i>                    | 19  | 0.0033 | 1163 | 0.0024 | 1.37 |
| <i>Stabijhoun</i>                     | 9   | 0.0016 | 362  | 0.0008 | 2.09 |
| Staffordshire Bull Terrier            | 73  | 0.0128 | 3299 | 0.0069 | 1.86 |
| Standard Poodle                       | 16  | 0.0028 | 1098 | 0.0023 | 1.22 |
| <i>Swedish Elkhound White</i>         | 1   | 0.0002 | 410  | 0.0009 | 0.20 |
| <i>Swedish Lapphund</i>               | 1   | 0.0002 | 57   | 0.0001 | 1.47 |
| <i>Swedish Vallhund</i>               | 28  | 0.0049 | 1145 | 0.0024 | 2.05 |
| <i>Thai Ridgeback</i>                 | 1   | 0.0002 | 63   | 0.0001 | 1.33 |
| <i>Tibetan Spaniel</i>                | 25  | 0.0044 | 7990 | 0.0166 | 0.26 |
| Tibetan Terrier                       | 10  | 0.0017 | 1330 | 0.0028 | 0.63 |
| <i>Toy Fox Terrier</i>                | 1   | 0.0002 | 22   | 0.0000 | 3.82 |
| Toy Poodle                            | 4   | 0.0007 | 1853 | 0.0039 | 0.18 |
| <i>Weimaraner</i>                     | 3   | 0.0005 | 363  | 0.0008 | 0.69 |
| <i>Welsh Corgi Cardigan</i>           | 12  | 0.0021 | 2047 | 0.0043 | 0.49 |
| <i>Welsh Corgi Pembroke</i>           | 16  | 0.0028 | 2563 | 0.0053 | 0.52 |
| Welsh Springer Spaniel                | 46  | 0.0080 | 2335 | 0.0049 | 1.66 |
| Welsh Terrier                         | 5   | 0.0009 | 191  | 0.0004 | 2.20 |
| West Highland White Terrier           | 51  | 0.0089 | 4920 | 0.0102 | 0.87 |
| <i>West Siberian Laika</i>            | 2   | 0.0003 | 701  | 0.0015 | 0.24 |
| <i>Whippet</i>                        | 63  | 0.0110 | 2443 | 0.0051 | 2.17 |
| <i>White Swiss Shepherd Dog</i>       | 66  | 0.0115 | 2889 | 0.0060 | 1.92 |
| Vizsla                                | 6   | 0.0010 | 323  | 0.0007 | 1.56 |
| <i>Volpino Italiano</i>               | 2   | 0.0003 | 367  | 0.0008 | 0.46 |
| <i>Xoloitzcuintle</i>                 | 1   | 0.0002 | 78   | 0.0002 | 1.08 |
| Yorkshire Terrier                     | 2   | 0.0003 | 2531 | 0.0053 | 0.07 |

**Table S2.** The variables (allergic symptoms) used in the definition of allergy score. Second column shows the contribution of each variable for the first extracted factor “allergy score” (allergic symptoms), which was selected for further analysis.

| <b>Allergic symptoms</b>                            | <b>Contribution</b> |
|-----------------------------------------------------|---------------------|
| Allergic skin symptoms                              | 0.167               |
| Atopic dermatitis symptoms                          | 0.106               |
| Other allergic or atopic symptoms                   | 0.072               |
| Demodex symptoms                                    | -0.024              |
| Food allergy symptoms                               | 0.096               |
| Pruritus symptoms                                   | 0.138               |
| Intensity of pruritus symptoms                      | 0.737               |
| Pruritus symptoms: corner of the mouth              | 0.487               |
| Pruritus symptoms: inner skin of the ear pinna      | 0.474               |
| Pruritus symptoms: outer margins of the ear         | 0.299               |
| Pruritus symptoms: dorsal side of the snout         | 0.316               |
| Pruritus symptoms: eyelid                           | 0.320               |
| Pruritus symptoms: neck/throat                      | 0.446               |
| Pruritus symptoms: armpit or axilla                 | 0.528               |
| Pruritus symptoms: interdigital or between toes     | 0.493               |
| Pruritus symptoms: abdomen                          | 0.608               |
| Pruritus symptoms: groin or inguinal area           | 0.624               |
| Pruritus symptoms: perineal area                    | 0.474               |
| Pruritus symptoms: flanks                           | 0.426               |
| Pruritus symptoms: back                             | 0.425               |
| Pruritus symptoms: tail                             | 0.403               |
| Pruritus symptoms: feet or pads                     | 0.483               |
| Pruritus symptoms: head                             | 0.211               |
| Pruritus symptoms: feet                             | 0.322               |
| Pruritus symptoms: elbow                            | 0.491               |
| Show first pruritus or skin symptoms                | 0.222               |
| Scratch or rub snout                                | -0.057              |
| Scratch, rub or lick corner of the mouth            | 0.033               |
| Scratch or rub eyes                                 | -0.078              |
| Scratch or rub ears                                 | 0.013               |
| Scratch, rub or lick feet                           | 0.032               |
| Scratch, rub, eat or lick groins or inguinal areas  | 0.080               |
| Lick, bite or rub caudal back                       | -0.004              |
| Scratch, rub, eat or lick all over                  | 0.100               |
| Show eczema or redness: not at all                  | -0.572              |
| Show eczema or redness: around the snout            | 0.296               |
| Show eczema or redness: at the corners of the mouth | 0.438               |
| Show eczema or redness: around the eyes             | 0.308               |
| Show eczema or redness: in the ears                 | 0.545               |
| Show eczema or redness: between the toes            | 0.503               |
| Show eczema or redness: under the feet              | 0.435               |
| Show eczema or redness: on the abdomen              | 0.673               |
| Show eczema or redness: in joint folds              | 0.665               |
| Show eczema or redness: on other skin areas         | 0.358               |
| Sneezing symptoms                                   | -0.088              |
| Cough symptoms                                      | -0.042              |
| Running eyes symptoms                               | -0.125              |
| Diarrhea symptoms                                   | -0.127              |
| Gas/flatulence symptoms                             | -0.138              |
| Constipation symptoms                               | -0.053              |
| Vomiting symptoms                                   | -0.130              |
| Diagnosed: eye infections                           | 0.251               |
| Diagnosed: urticaria                                | 0.367               |
| Diagnosed: recurring ear infections                 | 0.504               |
| Diagnosed: recurring skin infections                | 0.669               |
| Diagnosed: recurring “hot spots”                    | 0.356               |
| Diagnosed: not easily cured skin infections         | 0.532               |
| Diagnosed: skin turning black                       | 0.578               |
| Diagnosed: alopecia or thinning hair coat           | 0.514               |
| Diagnosed: skin thickening                          | 0.293               |

**Table S3.** The contribution of different land-use types for the first axis “urban–rural gradient”, which was used in further analyses. We measured the prevalence of different land-use types within 3 km distance from the current and birth homes.

| Extracted factors                                      | Current | Birth  |
|--------------------------------------------------------|---------|--------|
| Artificial areas and non-agricultural, vegetated areas | 0.579   | 0.452  |
| Coastal wetlands                                       | -0.029  | -0.004 |
| Industrial, commercial, and transport units            | 0.914   | 0.913  |
| Marine waters                                          | 0.254   | 0.003  |
| Open spaces with little or no vegetation               | 0.063   | 0      |
| Urban fabric                                           | 0.928   | 0.93   |
| Mine, dump and construction sites                      | 0       | 0.378  |

**Table S4.** Literature search about the allergy-prone breeds. Table shows the origin (country) of the study, breeds which were defined allergy-prone in the study, and the number of studies that defined each breed as allergy-prone (Total mentions). Breeds are organised by total mentions (N and % show absolute and relative prevalence in this study). Used studies are Tarpataki et al. 2006 (Hungary), Nødtvedt et al. 2006 (Sweden), Lund 2008 (Oregon), Picco et al. 2008 (Switzerland), Jaeger et al. 2010 (Australia, California\_2, Germany) and Bellumori et al. 2013 (California\_1).

| Breed                          | Oregon (USA) | California_1 (USA) | California_2 (USA) | Sweden | Hungary | Switzerland | Germany | Australia | # of mentioned | N   | %    |
|--------------------------------|--------------|--------------------|--------------------|--------|---------|-------------|---------|-----------|----------------|-----|------|
| West Highland White Terrier    | x            | x                  |                    | x      | x       | x           |         | x         | 6              | 51  | 0.35 |
| Boxer                          | x            |                    |                    | x      | x       | x           |         | x         | 5              | 73  | 0.19 |
| German Shepherd Dog            |              |                    |                    | x      | x       |             | x       | x         | 4              | 310 | 0.17 |
| Bull Terrier                   |              |                    |                    | x      |         | x           |         | x         | 3              | 28  | 0.36 |
| French bulldog                 |              |                    |                    |        | x       | x           | x       |           | 3              | 45  | 0.36 |
| Labrador Retriever             |              |                    |                    | x      |         |             | x       | x         | 3              | 126 | 0.13 |
| Golden Retriever               |              |                    | x                  |        |         |             | x       | x         | 3              | 108 | 0.12 |
| American Staffordshire Terrier |              |                    |                    | x      | x       |             |         |           | 2              | 36  | 0.33 |
| Dalmatian                      |              |                    |                    | x      | x       |             |         |           | 2              | 21  | 0.24 |
| Rhodesian Ridgeback            |              |                    |                    | x      |         | x           |         |           | 2              | 43  | 0.19 |
| Vizsla                         |              |                    |                    |        | x       | x           |         |           | 2              | 6   | 0.17 |
| Staffordshire Bull Terrier     | x            |                    |                    | x      |         |             |         |           | 2              | 73  | 0.15 |
| Newfoundland                   |              |                    |                    | x      | x       |             |         |           | 2              | 36  | 0.11 |
| Jack Russel Terrier            | x            |                    |                    |        |         |             | x       |           | 2              | 72  | 0.08 |
| Cairn Terrier                  | x            | x                  |                    |        |         |             |         |           | 2              | 51  | 0.08 |
| Bichon Frisé                   | x            |                    | x                  |        |         |             |         |           | 2              | 46  | 0.02 |
| American Bulldog               | x            |                    |                    |        |         |             |         |           | 1              | 2   | 0.50 |
| Puli                           |              |                    |                    |        | x       |             |         |           | 1              | 2   | 0.50 |
| Bulldog                        | x            |                    |                    |        |         |             |         |           | 1              | 18  | 0.33 |
| Tibetan Terrier                |              | x                  |                    |        |         |             |         |           | 1              | 10  | 0.30 |
| English Setter                 |              |                    |                    |        | x       |             |         |           | 1              | 7   | 0.29 |
| Boston Terrier                 | x            |                    |                    |        |         |             |         |           | 1              | 22  | 0.27 |
| Dobermann                      |              |                    |                    |        | x       |             |         |           | 1              | 23  | 0.22 |
| Havanese                       | x            |                    |                    |        |         |             |         |           | 1              | 34  | 0.21 |



|                                   |   |   |  |   |   |  |   |   |    |      |
|-----------------------------------|---|---|--|---|---|--|---|---|----|------|
| Poodle                            |   |   |  | x |   |  |   | 1 | 49 | 0.18 |
| Danish-Swedish Farmdog            |   |   |  | x |   |  |   | 1 | 26 | 0.15 |
| Irish Soft Coated Wheaten Terrier |   |   |  | x |   |  |   | 1 | 59 | 0.15 |
| Welsh Springer Spaniel            |   |   |  | x |   |  |   | 1 | 46 | 0.15 |
| Chow Chow                         |   |   |  |   | x |  |   | 1 | 20 | 0.15 |
| Pumi                              |   |   |  |   | x |  |   | 1 | 21 | 0.14 |
| Old English Sheepdog              |   |   |  |   | x |  |   | 1 | 14 | 0.14 |
| Great Dane                        |   |   |  |   |   |  | x | 1 | 52 | 0.08 |
| Miniature Schnauzer               | x |   |  |   |   |  |   | 1 | 95 | 0.07 |
| Fox Terrier Wire                  |   | x |  |   |   |  |   | 1 | 15 | 0.07 |
| Cavalier King Charles Spaniel     |   |   |  |   |   |  | x | 1 | 33 | 0.06 |
| Dachshund                         |   |   |  |   | x |  |   | 1 | 60 | 0.05 |
| English Cocker Spaniel            |   |   |  |   | x |  |   | 1 | 29 | 0.03 |
| Schnauzer                         | x |   |  |   |   |  |   | 1 | 27 | 0.00 |
| Australian Silky Terrier          |   |   |  |   |   |  | x | 1 | 14 | 0.00 |
| Welsh Terrier                     |   |   |  | x |   |  |   | 1 | 5  | 0.00 |
| Shih Tzu                          | x |   |  |   |   |  |   | 1 | 3  | 0.00 |
| Maltese                           | x |   |  |   |   |  |   | 1 | 2  | 0.00 |
| Yorkshire Terrier                 | x |   |  |   |   |  |   | 1 | 2  | 0.00 |
| Lhasa Apso                        | x |   |  |   |   |  |   | 1 | 1  | 0.00 |

**Table S5.** The factors forming the three independent environmental factors (outdoor exposure, outdoor activities, and agricultural lifestyle) used in the model of Table 3. The independent factors were extracted by factor analysis.

|                                         | Outdoor exposure | Outdoor activities | Agricultural lifestyle |
|-----------------------------------------|------------------|--------------------|------------------------|
| Dirt eating outdoors                    | 0.543            |                    |                        |
| Grass eating outdoors                   | 0.524            |                    |                        |
| Feces eating and urine licking outdoors | 0.517            |                    |                        |
| Drinking from waterways                 | 0.410            |                    |                        |
| Freedomness of movement                 |                  | 0.745              |                        |
| Environment outdoors                    |                  | 0.581              |                        |
| Agriculture at current home             |                  |                    | 0.588                  |
| Contact with farm animals               |                  |                    | 0.500                  |

**Form S1.** Translated questionnaire form used in study.

## The residential environments and canine allergy-survey

*In this survey, we study how living environment of a dog influence on canine allergies, which has increased recently.*

*Please, be honest with your answers: We want to study factors affecting dog health, not to evaluate anyone's dog keeping.*

*We hope that you answer this survey even though your dog is not having allergic disease.*

*All information is processed confidentiality and following the principles of law. Address information is used for definition of land use types around residential areas.*

### **Basic information of dog and owner**

**2.1.** First name of owner:

**2.2.** Last name of owner:

**2.3.** Street address:

**2.4.** Postal code:

**2.5.** Postal city:

**2.6.** Dog has moved with current owners

1. never
2. once
3. twice
4. thrice
5. more than three times

**2.7.** If dog have moved, write previous addresses:

**2.8.** Phone number:

**2.9.** Email:

**2.10.** The official name of dog:

**2.11.** The nick name of dog:

**2.12.** The breed of dog:

**2.13.** The register number of dog:

*The birthday of dog:*

**2.14.** Day:

**2.15.** Month:

**2.16.** Year:

**2.17.** If dog has died, write the date and cause of death:

**2.18.** The sex of dog:

1. Female
2. Male

**2.19.** Has dog been sterilized or castrated?

1. Yes
2. No

**2.20.** How large proportion of the dog's fur is white?

1. 0 %
2. about 25 %
3. about 50 %
4. about 75 %
5. 100 %

**2.21.** Have you given a blood sample of your dog for the Canine Genetics research group of the University of Helsinki?

1. Yes
2. No

### **Background of the dog**

**3.1.** How many weeks old was the dog when arriving to current owners?

**3.2.** Where was your dog born and/or spent its first weeks?

1. I do not know
2. Dog is born in its current home
3. Dog is born in address mentioned below

**3.3.** The street address of birth home:

**3.4.** The postal code of birth home:

**3.5.** The postal city of birth home:

**3.6.** The dog was born and/or spent its first weeks

1. In city center
2. In municipality center
3. In Conurbation of urban area
4. In Conurbation of country-side
5. In sparsely populated area
6. I do not know

**3.7.** In what kind of building has your dog is born and/or spent its first weeks

1. In flat/apartment
2. In row house
3. In town house
4. In farm house

- 5. In outdoor facilities
- 6. I do not know

**3.8.** Was there agricultural activities in your dog’s breeder house while dog was there?

- 1. I do not know
- 2. No
- 3. Yes, a part-time
- 4. Yes, a full-time

**3.9.** Did your dog’s dam give a birth and take care of her puppies in dam’s home or somewhere else?

- 1. I do not know
- 2. Dam gave birth somewhere else than its current home (dam is a co-owned dog)
- 3. Dam gave birth in its current home

**3.10.** In which age (in weeks) your dog was weaned from its dam?

**3.11.** If you know what kind of food the dam was eating while being pregnant and nursing, describe here:

**3.12.** If you know, what kind of food your dog was eating before weaning age, describe here:

**3.13.** Has your dog experienced things described below after withdrawal from its dam up to 4 months of age? Mark the most adequate option in all sections.

|                                         | I do not know | Never | Few times | Several times in a month | Several times in a week | Several times in a day |
|-----------------------------------------|---------------|-------|-----------|--------------------------|-------------------------|------------------------|
| Dog met strange adult dogs              |               |       |           |                          |                         |                        |
| Dog visited cities or other busy places |               |       |           |                          |                         |                        |
| Dog travelled by car                    |               |       |           |                          |                         |                        |
| Dog travelled by bus or train           |               |       |           |                          |                         |                        |
| Dog met strange humans                  |               |       |           |                          |                         |                        |
| Dog met farm animals                    |               |       |           |                          |                         |                        |

**3.14.** How much were your dog outdoors under two months age (before moving to you)?

- 1. I do not know
- 2. Not at all
- 3. Couple times in a month
- 4. Few times in a week
- 5. Once in a day

6. Many times in a day
7. Dog could move freely to outside

**3.15.** How much were your dog outdoors daily (in hours) when it was..

|             | I do not know | Not at all | 0.5 hour | 1 hour | 2 hours | 3 hours or more |
|-------------|---------------|------------|----------|--------|---------|-----------------|
| 3-4 months  |               |            |          |        |         |                 |
| 5-6 months  |               |            |          |        |         |                 |
| 7-12 months |               |            |          |        |         |                 |

### **Dog practices**

**4.1.** If your dog is a bitch, does it have puppies?

1. Yes
2. No

**4.2.** If your dog is a bitch and it have had puppies, mark here the litter details:

**4.3.** Is your dog a work dog?

1. My dog is not a work dog
2. Police dog
3. Border patrol dog
4. Guide dog
5. Drug dog
6. Service dog
7. Hearing dog
8. Mold detection dog
9. Other work dog (define below)

**4.4.** If you answered that your dog is other work dog, what kind of work does your dog do?

**4.5.** Do you have hobbies with your dog?

1. Yes
2. No

**4.6.** If you have hobbies with your dog, what kind of they are?

**4.7.** How much does your dog travel outside of your normal home conditions for example to dog shows, practices, competitions or work?

1. Not at all
2. 1-6 times in a year
3. 1-3 times in a month
4. 1-3 times in a week
5. Almost daily

**4.8.** What is the usual purpose of these travels?

### **Allergic symptoms and diseases of the dog, Part 1/2**

**5.1.** Has your dog ever had any of the following diseases?

|                                              | No | Yes,<br>according to<br>breeder | Yes,<br>according to<br>vet | Yes,<br>according to<br>own<br>judgement | Yes,<br>according to<br>somebody<br>else (define<br>to next<br>section) | Who? |
|----------------------------------------------|----|---------------------------------|-----------------------------|------------------------------------------|-------------------------------------------------------------------------|------|
| Allergic skin symptoms                       |    |                                 |                             |                                          |                                                                         |      |
| Atopic dermatitis                            |    |                                 |                             |                                          |                                                                         |      |
| Any other allergic or atopy related symptoms |    |                                 |                             |                                          |                                                                         |      |
| Demodicosis or Demodectic mange              |    |                                 |                             |                                          |                                                                         |      |
| Food intolerance or food sensibility         |    |                                 |                             |                                          |                                                                         |      |

**5.2.** Has your dog ever suffered from scratching / pruritus?

1. Not at all
2. Little (once in a month - once in a week)
3. Moderately (once in a week - every second day)
4. Regularly (daily)

**5.3.** Estimate the severity of your dog's scratching when it is "on", using the scale below. Please use a number to evaluate the severity of the scratching (e.g. 22 or 87):

|     |                                                                                                                                                                                                                  |
|-----|------------------------------------------------------------------------------------------------------------------------------------------------------------------------------------------------------------------|
| 100 | <b>Extremely intensive/almost constant scratching</b><br>Nothing than physical barrier (e.g. collar) makes the dog stop the scratching/licking/biting                                                            |
| 90  |                                                                                                                                                                                                                  |
| 80  | <b>Intensive scratching/lengthened scratching periods</b><br>Scratching can appear in nights (can be detected if dog is being monitored). Dog itches also when it is eating, playing or being active.            |
| 70  |                                                                                                                                                                                                                  |
| 60  | <b>Moderate scratching/regularly repetitive scratching periods</b><br>Scratching can appear in nights (can be detected if dog is being monitored). Dog does not itch when it is eating, playing or being active. |
| 50  |                                                                                                                                                                                                                  |
| 40  | <b>Mild scratching/slightly more frequent scratching periods</b><br>Scratching does not appear in nights or when dogs is eating, playing or being active                                                         |
| 30  |                                                                                                                                                                                                                  |
| 20  | <b>Very mild scratching/only random scratching periods</b><br>Dog itches only slightly more than normal                                                                                                          |
| 10  |                                                                                                                                                                                                                  |
| 0   | <b>Normal dog</b>                                                                                                                                                                                                |

Dog does not itch more than normal, healthy dog

5.4. Pick those sections (using the picture below) that have sometimes itched in your dog:

- A. Corner of the mouth
- B. Inner skin of the ear pinna
- C. Outer margins of the ear
- D. Dorsal side of the snout
- E. Eyelid
- F. Neck / throat
- G. Armpit or axilla
- H. Interdigital or between toes
- I. Abdomen
- J. Groin or inguinal area
- K. Perineal area
- L. Flanks
- M. Back
- N. Tail
- O. Feet, pads
- P. Head
- Q. Feet
- R. Elbow

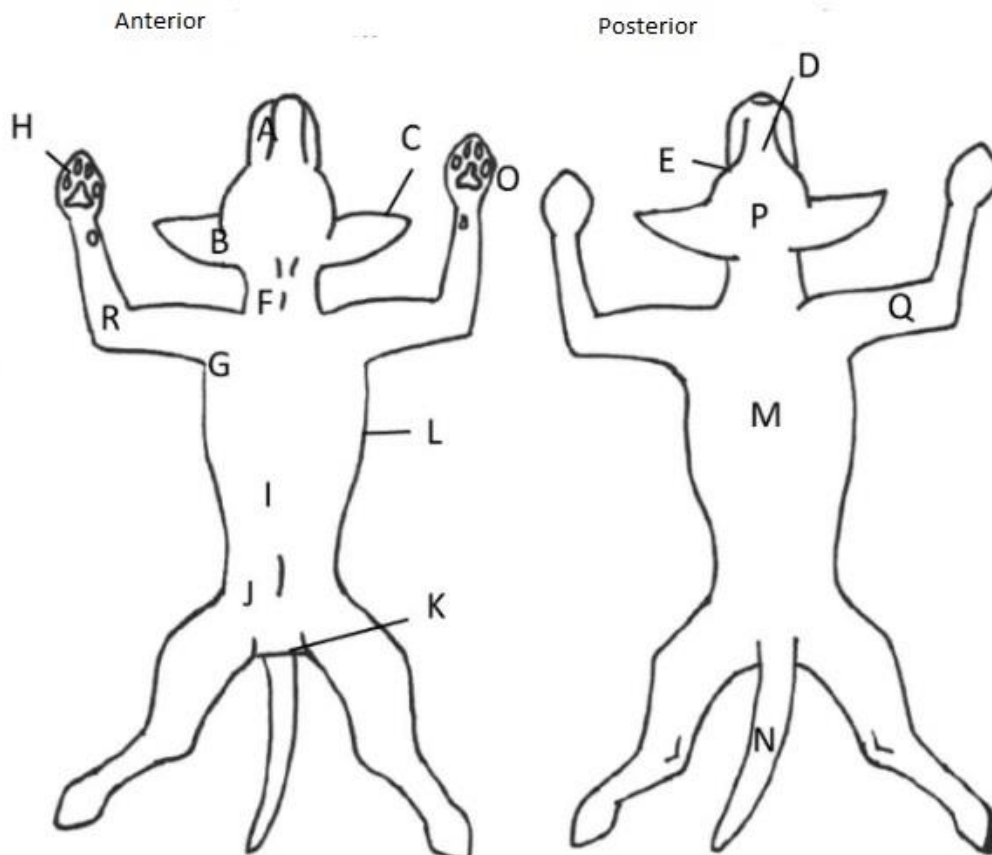

**5.5.** If your dog has both suffered from scratching and has had visual skin symptoms, which of them started first?

1. My dog had visual skin symptoms before scratching
2. My dog had scratching before visual skin symptoms

**5.6.** Has your dog ever had any of the following skin symptoms and how severe were they?

|                                                                | Never | Few times | Once in a month – once in a week | Once in a week – every second day | Couple times daily | Constantly |
|----------------------------------------------------------------|-------|-----------|----------------------------------|-----------------------------------|--------------------|------------|
| Dog rubs or scratches its snout                                |       |           |                                  |                                   |                    |            |
| Dog scratches, rubs or licks its corner of the mouth           |       |           |                                  |                                   |                    |            |
| Dog scratches or rubs its eyes                                 |       |           |                                  |                                   |                    |            |
| Dog scratches or rubs its ears                                 |       |           |                                  |                                   |                    |            |
| Dog scratches, rubs or licks its feet                          |       |           |                                  |                                   |                    |            |
| Dog scratches, rubs, eats or licks its groin or inguinal areas |       |           |                                  |                                   |                    |            |
| Dog licks, bites or rubs its caudal back                       |       |           |                                  |                                   |                    |            |
| Dog scratches, rubs, eats or licks itself all over             |       |           |                                  |                                   |                    |            |

**5.7.** Has your dog ever had redness or eczema?

- A. Not at all
- B. Around the snout
- C. At the corners of the mouth
- D. Around the eyes



- E. In the ears
- F. Between the toes
- G. Under the feet
- H. On the abdomen
- I. In joint folds
- J. On other skin areas

**5.8.** Has your dog ever had any of the following symptoms..

|                   | Not at all | Few times | Once in a month – once in a week | Once in a week – every second day | Couple times daily | Constantly/Many times in a day |
|-------------------|------------|-----------|----------------------------------|-----------------------------------|--------------------|--------------------------------|
| sneezing?         |            |           |                                  |                                   |                    |                                |
| cough?            |            |           |                                  |                                   |                    |                                |
| running eyes?     |            |           |                                  |                                   |                    |                                |
| diarrhea?         |            |           |                                  |                                   |                    |                                |
| gas / flatulence? |            |           |                                  |                                   |                    |                                |
| constipation?     |            |           |                                  |                                   |                    |                                |
| vomiting?         |            |           |                                  |                                   |                    |                                |

**5.9.** Has your dog ever had (you can choose several options)..

- A. Eye infections e.g. conjunctivitis
- B. Urticaria (allergic reaction of skin that comes e.g. after an insect bite)
- C. Recurring ear infections caused by bacteria or yeasts
- D. Recurring skin infections caused by bacteria or yeasts
- E. Recurring “hot spots”
- F. Not easily cured skin infections
- G. Skin turning dark
- H. Alopecia (loosing hair coat) or thinning hair coat
- I. Skin thickening (please specify below)

**5.10.** If your dog has experienced thickening of the skin, on what parts did it happen?

**5.11.** Has your dog suffered from other skin symptoms? Please specify their character and location.

**5.12.** How old was your dog when skin related symptoms started? E.g. 3 years or 7,5 months

**5.13.** My dog shows most of its symptoms..

|                  | More | Less | as much as in any season | I don't know |
|------------------|------|------|--------------------------|--------------|
| in summer        |      |      |                          |              |
| in spring        |      |      |                          |              |
| in autumn        |      |      |                          |              |
| in winter        |      |      |                          |              |
| in humid weather |      |      |                          |              |

**Allergic symptoms and diseases of the dog, Part 2/2**

**6.1.** If you have treated the skin symptoms of your dog, please specify the result of it:

|                                           | Symptoms decreased | Symptoms increased | No effect | I don't know | I have not used this treatment |
|-------------------------------------------|--------------------|--------------------|-----------|--------------|--------------------------------|
| Antibiotics                               |                    |                    |           |              |                                |
| Antihistamine                             |                    |                    |           |              |                                |
| Cyclosporine                              |                    |                    |           |              |                                |
| Immunotherapy                             |                    |                    |           |              |                                |
| Fatty acid product                        |                    |                    |           |              |                                |
| Local corticosteroid                      |                    |                    |           |              |                                |
| Systemic corticosteroid (taken perorally) |                    |                    |           |              |                                |
| Shampoo                                   |                    |                    |           |              |                                |
| Diet                                      |                    |                    |           |              |                                |
| Other treatment                           |                    |                    |           |              |                                |
| Skin cream                                |                    |                    |           |              |                                |
| Ear drops                                 |                    |                    |           |              |                                |

**6.2.** Has your dog been on an elimination diet?

1. No
2. Yes (specify below)

**6.3.** What happened during the elimination diet of your dog?

**6.4.** How the elimination diet affected on the symptoms of your dog (you can choose several options)?

- A. There was no change in symptoms
- B. The symptoms eased
- C. The symptoms worsened
- D. When the dog returned to its basic diet there was no change in symptoms
- E. When the dog returned to its basic diet the symptoms eased
- F. When the dog returned to its basic diet the symptoms worsened
- G. The elimination diet was kept

**6.5.** If your dog has been treated with something else, describe?

**6.6.** If your dog has been allergy tested, please mark the used test and the results:

**6.7.** Please mark if the near family of your dog has suffered from skin symptoms

|               | I do not know | These relatives does not exist | No symptoms | Allergic/Atopic disease | Other skin disease | Both Allergic/Atopic disease and other skin disease |
|---------------|---------------|--------------------------------|-------------|-------------------------|--------------------|-----------------------------------------------------|
| Dog's parents |               |                                |             |                         |                    |                                                     |

|                 |  |  |  |  |  |  |
|-----------------|--|--|--|--|--|--|
| Dog's siblings  |  |  |  |  |  |  |
| Other relatives |  |  |  |  |  |  |

**6.8.** If you have other dogs or animals in the house, do they suffer from skin symptoms? If yes, what kind of skin symptoms?

**6.9.** Does your dog suffer from any chronic disease?

1. No
2. Yes

**6.10.** If yes, what disease?

**6.11.** Does dog have a permanent medication, if yes what kind of?

**6.12.** People currently living in your household: list the birth years of these people (e.g. 1957, 1954, and 1986):

**6.13.** Do any of the adult humans living with the dog have any of the following diseases?

|                   | Yes, according to own judgement | Yes, diagnosed by medical doctor | No |
|-------------------|---------------------------------|----------------------------------|----|
| Allergic rhinitis |                                 |                                  |    |
| Atopic eczema     |                                 |                                  |    |
| Asthma            |                                 |                                  |    |

**6.14.** Do any of the children living with the dog have any of the following diseases?

|                   | Yes, according to own judgement | Yes, diagnosed by medical doctor | No |
|-------------------|---------------------------------|----------------------------------|----|
| Allergic rhinitis |                                 |                                  |    |
| Atopic eczema     |                                 |                                  |    |
| Asthma            |                                 |                                  |    |

### **Dog's diet**

**7.1.** My dog eats mainly

1. Manufactured dog food, that is from pet shop
2. Manufactured dog food, that is from market
3. Home food made specially for dog
4. Leftovers from the food of the humans
5. Raw food (BARF)
6. Both manufactured and raw food
7. Both raw food and home food
8. Manufactured dog food, that is from pharmacy or veterinary shop
9. Something else (specify below):

**7.2.** If your dog eats something else, what is it?

**7.3.** Does your dog get additional nutrients (e.g. vitamins or oils)?

1. Basically never
2. Sometimes
3. Regularly

**7.4.** If your dog gets additional nutrients, write down the product name:

**Dog's outdoor activity**

**8.1.** How often is your dog outdoors or go for a walk in a day?

1. Dog goes for a walk thrice or often in a day
2. Dog goes for a walk twice in a day
3. Dog goes for a walk once in a day
4. Dog is outside all the time or part of the time (e.g.in dog yard) and goes also for a walk daily
5. Dog is outside all the time or part of the time (e.g.in dog yard) and goes also for a walk few times a week
6. Dog is outside all the time or part of the time (e.g.in dog yard) and goes also for a walk less than once in a week
7. Dog is outdoors and/or goes for a walk other ways (please specify below):

**8.2.** If your dog is outdoors and/or goes for a walk other ways, tell how?

**8.3.** How much dog is walking daily?

1. 3 hours or more
2. 2 hours
3. an hour
4. about half an hour
5. less than half an hour

**8.4.** During the walk is your dog..

1. free all the time or most of the time
2. free part of time and other part in leashed
3. almost always in leashed
4. always in leashed

**8.5.** In what kind of environment do you mainly walk with the dog?

1. In forest using trails or terrain
2. In forest using tracks or other outdoor routes
3. In field using trails or terrain
4. In field using street
5. In parks of Conurbation area using sand or asphalt streets
6. In urban areas Conurbation area using asphalt streets
7. In dog parks

**8.6.** Do you let your dog or does your dog do following things (you can choose several options):

- A. Eats soil, clay or stones
- B. Drinks water from puddles, ditches or other drainage systems
- C. Carries or gnaws sticks
- D. Eats grass or other vegetation

E. Eats or licks faeces or urine

**Dog's home and environment**

**9.1.** The dog's current home is:

1. In city center
2. In municipality center
3. In Conurbation of urban area (suburban)
4. In Conurbation of country-side
5. In sparsely populated area

**9.2.** The dog lives mainly:

1. Inside
2. Outside chained
3. Outside in dog yard
4. Partly outside and partly inside
5. Other (specify below):

**9.3.** If your dog lives other, describe how:

**9.4.** If your dog lives inside, what kind of residence does it live?

1. In flat/apartment
2. In row house
3. In town house
4. In farm house

**9.5.** Is there agricultural activities in your dog's current home (your home)?

1. No
2. Yes, a part-time
3. Yes, a full-time

**9.6.** The household also includes (you can choose several options):

- A. Other dog or dogs
- B. Cat or cats
- C. Other indoor pets with fur
- D. Other outdoor pets
- E. Farm animals
- F. Furless indoor pets

**9.7.** How many dogs have you owned during your adult life (including the current dog)?

**9.8.** How long in average is your dog daily without presence of humans?

1. 0 hours
2. 1-2 hours
3. 3-6 hours
4. 7-8 hours
5. 9-10 hours
6. over 10 hours

**9.9.** Does someone smoke inside in places where your dog spends a lot of time?

1. Yes, often
2. Yes, sometimes
3. Yes, seldom
4. Never

**9.10.** Is your dog exposed to cigarette smoke while being outside (e.g. does someone smoke while walking with the dog)?

1. Yes, often
2. Yes, sometimes
3. Yes, but seldomly
4. Never

**9.11.** Does your dog spend time yearly in countryside (e.g. in summer cottage or with friends/relatives) for three weeks or more?

1. Yes
2. No

**9.12.** How far the nearest heavy industry locates from dog's current home?

1. Under 100 metres
2. 100-500 metres
3. About 1 kilometer distance
4. 2-5 kilometers
5. Further away
6. I do not know

**9.13.** How far the nearest farm locates from dog's current home?

1. Under 100 metres
2. 100-500 metres
3. About 1 kilometer distance
4. 2-5 kilometers
5. Further away
6. I do not know

**9.14.** If you want to specify something in previous questions, you can write here:

**9.15.** If you want, you can give feedback here. Tell for example if you found some questions especially difficult:

**Thank you for filling the questionnaire!**
